# Supplementary material
Source: PubMed Central journal article supplement (PMC4502720)
Supplement: chest_145_2_331_ds01.pdf [file chest_145_2_331_ds01.pdf]

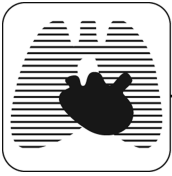

## Quality Gaps and Comparative Effectiveness in Lung Cancer Staging and Diagnosis

*David E. Ost, MD, MPH, FCCP; Jiangong Niu, PhD; Linda S. Elting, DrPH; Thomas A. Buchholz, MD; and Sharon H. Giordano, MD*

### e-Appendix 1.

#### Methods

SEER and TCR algorithms for determining stage:

For TCR, we used dss00s1 (2004+) and sssm2z1 (2003-) for 'regional' stage. For SEER, we used sss77v1 (2000-), sssm2z1 (2001-2003) for 'regional' stage, and dajccm1, dajccn1 (2004+) for M0 and N1,N2,N3 stages. For 2004+ patients, we used dajcct1 to remove T4 patients. So in summary, TCR patients had regional stage disease, SEER patients from 2003 and before had regional stage disease and we were able to identify their T stage, and for SEER patients from 2004-2007 we had detailed information on their complete TNM stage (T1-T3, N1-3, and M0).

#### Participants and rationale for algorithm criteria

Patients in HMO's were excluded since detailed claims data were required for the analysis. Patients with known T4 disease were excluded since patients with direct mediastinal invasion on imaging would be at least stage IIIA and lymph node sampling might not be required in such cases.<sup>2-4</sup> Because staging is mainly relevant for treatment planning patients were only included if they received some form of treatment. Treatment was defined as any chemotherapy, radiation or surgery. The type of treatment received was determined by analyzing CPT codes (e-Table 1).

*Online supplements are not copyedited prior to posting.*



### Test sequencing definitions, categories, and rationale

If mediastinal lymph node sampling was performed on the same day as surgical resection, this was categorized as mediastinal lymph node sampling first. Bronchoscopy without TBNA was considered as a biopsy of the peripheral lesion without mediastinal lymph node sampling. While CT-guided needle biopsy of mediastinal lymph nodes can be performed, this is rarely done since it is associated with a much higher complication rate than EBUS-TBNA and as such it represents an inferior technique. Therefore, CT-guided needle biopsy was considered as inconsistent with guidelines when done as a first procedure.

*Online supplements are not copyedited prior to posting.*

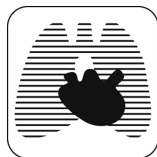

**e-Table 1. ICD9 and CPT codes for determining diagnostic testing, treatments, and outcomes**

| Procedures                             | ICD-9 Diagnosis Codes | ICD-9 Procedure Codes | CPT/HCPCS codes                                                                                                                                                                                        |
|----------------------------------------|-----------------------|-----------------------|--------------------------------------------------------------------------------------------------------------------------------------------------------------------------------------------------------|
| <b>Diagnostic Tests</b>                |                       |                       |                                                                                                                                                                                                        |
| CT-guided Biopsy                       |                       |                       | 32405, 10022                                                                                                                                                                                           |
| Bronch without TBNA                    |                       |                       | 31622, 31623, 31624, 31625, 31627, 31628, 31632, 31645, no 31629                                                                                                                                       |
| Bronch with TBNA                       |                       |                       | 31629 but no 31620                                                                                                                                                                                     |
| Bronch with TBNA+EBUS                  |                       |                       | 31629 and 31620                                                                                                                                                                                        |
| Mediastinotomy or Mediastinoscopy      |                       |                       | 39000,39010,39220,39400,32662                                                                                                                                                                          |
| Endoscopy with ultrasound              |                       |                       | 43232                                                                                                                                                                                                  |
| Thoracotomy                            |                       |                       | 19272, 31786, 32095, 32100, 32440, 32442, 32445, 32480, 32482, 32484, 32486, 32488, 32500, 32503, 32504, 32520, 32522, 32525, 32602, 32606, 32657, 32662, 32663,38746                                  |
| <b>Complications</b>                   |                       |                       |                                                                                                                                                                                                        |
| Pneumothorax                           | 512                   |                       |                                                                                                                                                                                                        |
| Pneumothorax requiring a chest tube    | 512                   | 34.04                 | 32002,32020                                                                                                                                                                                            |
| Hemorrhage requiring blood transfusion | 998.1                 | 99.03, 99.04          | 36430                                                                                                                                                                                                  |
| Respiratory failure                    |                       | 96.04 plus 96.7       | 31500                                                                                                                                                                                                  |
| <b>Treatments</b>                      |                       |                       |                                                                                                                                                                                                        |
| Radiation Therapy                      |                       |                       | 77371-77373, 77401-77525, 77761-77799, G0251, G0339, G0340, G0174                                                                                                                                      |
| Chemotherapy                           |                       |                       | 96400 – 96549, J9000 – J9999, Q0083 – Q0085, J8520, J8521, J8530, J8540, J8560, J8597, J8610, J8999; EXCLUDE ALL OF THE FOLLOWING CODES: J9003, J9165, J9175, J9202, J9209, J9212- J9226, J9240, J9395 |
| Surgery                                |                       |                       | 19272, 32440, 32442, 32445, 32480, 32482, 32484, 32486, 32488, 32500, 32503, 32504, 32520, 32522, 32525, 32657, 32662, 32663,38746                                                                     |

*Online supplements are not copyedited prior to posting.*



**e-Table 2. Cross-table of SEER and TCR**

| Variables                                                                     | SEER          | TCR          | Total         | p value |
|-------------------------------------------------------------------------------|---------------|--------------|---------------|---------|
|                                                                               | N (%)         | N (%)        | N (%)         |         |
| All subjects                                                                  | 12363 (100)   | 3568 (100)   | 15931 (100)   |         |
| Age                                                                           |               |              |               | 0.31    |
| 66-70                                                                         | 3784 (30.61)  | 1133 (31.75) | 4917 (30.86)  |         |
| 71-75                                                                         | 3798 (30.72)  | 1115 (31.25) | 4913 (30.84)  |         |
| 76-80                                                                         | 3008 (24.33)  | 823 (23.07)  | 3831 (24.05)  |         |
| >80                                                                           | 1773 (14.34)  | 497 (13.93)  | 2270 (14.25)  |         |
| Gender                                                                        |               |              |               | <.0001  |
| Female                                                                        | 5865 (47.44)  | 1556 (43.61) | 7421 (46.58)  |         |
| Male                                                                          | 6498 (52.56)  | 2012 (56.39) | 8510 (53.42)  |         |
| Comorbidities                                                                 |               |              |               | 0.05    |
| 0                                                                             | 6290 (50.88)  | 1749 (49.02) | 8039 (50.46)  |         |
| 1                                                                             | 3678 (29.75)  | 1067 (29.9)  | 4745 (29.79)  |         |
| 2+                                                                            | 2395 (19.37)  | 752 (21.08)  | 3147 (19.75)  |         |
| Cancer type                                                                   |               |              |               | 0.63    |
| NSCLC                                                                         | 10656 (86.19) | 3064 (85.87) | 13720 (86.12) |         |
| Small cell                                                                    | 1707 (13.81)  | 504 (14.13)  | 2211 (13.88)  |         |
| Practice Pattern and Mediastinal Sampling                                     |               |              |               | 0.001   |
| Guideline consistent, mediastinal sampling done first                         | 2435 (19.7)   | 720 (20.18)  | 3155 (19.8)   |         |
| Guideline inconsistent, NSCLC present, mediastinal sampling done 2nd or later | 3713 (30.03)  | 946 (26.51)  | 4659 (29.25)  |         |
| Guideline inconsistent, NSCLC present, mediastinal sampling never done        | 4488 (36.3)   | 1393 (39.04) | 5881 (36.92)  |         |
| Guideline inconsistent, Small cell present                                    | 1247 (10.09)  | 374 (10.48)  | 1621 (10.18)  |         |
| No Evaluation Recorded                                                        | 480 (3.88)    | 135 (3.78)   | 615 (3.86)    |         |
| Guideline consistency                                                         |               |              |               | 0.54    |
| Consistent                                                                    | 2435 (20.49)  | 720 (20.97)  | 3155 (20.6)   |         |
| Not consistent                                                                | 9448 (79.51)  | 2713 (79.03) | 12161 (79.4)  |         |

*Online supplements are not copyedited prior to posting.*



**e-Table 3. Characteristics of propensity score case-matched pairs of lung cancer patients**

| Variables               | Guideline Consistent | Guideline Inconsistent | Total        | p value |
|-------------------------|----------------------|------------------------|--------------|---------|
|                         | N (%)                | N (%)                  | N (%)        |         |
| All subjects            | 2859 (100)           | 2859 (100)             | 5718 (100)   |         |
| Age                     |                      |                        |              | 0.1921  |
| 66-70                   | 961 (33.61)          | 960 (33.58)            | 1921 (33.6)  |         |
| 71-75                   | 908 (31.76)          | 945 (33.05)            | 1853 (32.41) |         |
| 76-80                   | 689 (24.1)           | 627 (21.93)            | 1316 (23.02) |         |
| >80                     | 301 (10.53)          | 327 (11.44)            | 628 (10.98)  |         |
| Gender                  |                      |                        |              | 0.3682  |
| Female                  | 1362 (47.64)         | 1396 (48.83)           | 2758 (48.23) |         |
| Male                    | 1497 (52.36)         | 1463 (51.17)           | 2960 (51.77) |         |
| Race                    |                      |                        |              | 0.7953  |
| Non-Hispanic White      | 2491 (87.13)         | 2511 (87.83)           | 5002 (87.48) |         |
| Hispanic                | 118 (4.13)           | 119 (4.16)             | 237 (4.15)   |         |
| Non-Hispanic Black      | 171 (5.98)           | 158 (5.53)             | 329 (5.75)   |         |
| Non-Hispanic Other      | 79 (2.76)            | 71 (2.48)              | 150 (2.62)   |         |
| Year of Diagnosis       |                      |                        |              | 0.9655  |
| 1995                    | 104 (3.64)           | 112 (3.92)             | 216 (3.78)   |         |
| 1996                    | 82 (2.87)            | 83 (2.9)               | 165 (2.89)   |         |
| 1997                    | 88 (3.08)            | 85 (2.97)              | 173 (3.03)   |         |
| 1998                    | 82 (2.87)            | 86 (3.01)              | 168 (2.94)   |         |
| 1999                    | 74 (2.59)            | 61 (2.13)              | 135 (2.36)   |         |
| 2000                    | 190 (6.65)           | 207 (7.24)             | 397 (6.94)   |         |
| 2001                    | 315 (11.02)          | 298 (10.42)            | 613 (10.72)  |         |
| 2002                    | 278 (9.72)           | 271 (9.48)             | 549 (9.6)    |         |
| 2003                    | 354 (12.38)          | 364 (12.73)            | 718 (12.56)  |         |
| 2004                    | 349 (12.21)          | 350 (12.24)            | 699 (12.23)  |         |
| 2005                    | 310 (10.84)          | 297 (10.39)            | 607 (10.62)  |         |
| 2006                    | 320 (11.19)          | 306 (10.7)             | 626 (10.95)  |         |
| 2007                    | 313 (10.95)          | 339 (11.86)            | 652 (11.4)   |         |
| SEER/TCR Region         |                      |                        |              | 0.9881  |
| Atlanta & Rural Georgia | 65 (2.27)            | 55 (1.92)              | 120 (2.1)    |         |
| California              | 586 (20.5)           | 609 (21.3)             | 1195 (20.9)  |         |
| Connecticut             | 225 (7.87)           | 216 (7.56)             | 441 (7.71)   |         |

*Online supplements are not copyedited prior to posting.*

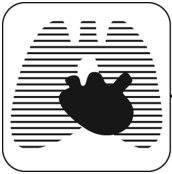

|                            |              |              |              |        |
|----------------------------|--------------|--------------|--------------|--------|
| Detroit                    | 304 (10.63)  | 309 (10.81)  | 613 (10.72)  |        |
| Hawaii                     | 23 (0.8)     | 19 (0.66)    | 42 (0.74)    |        |
| Iowa                       | 165 (5.77)   | 159 (5.56)   | 324 (5.67)   |        |
| Kentucky                   | 181 (6.33)   | 169 (5.91)   | 350 (6.12)   |        |
| Louisiana                  | 94 (3.29)    | 109 (3.81)   | 203 (3.55)   |        |
| New Jersey                 | 340 (11.89)  | 334 (11.68)  | 674 (11.79)  |        |
| New Mexico                 | 44 (1.54)    | 41 (1.43)    | 85 (1.49)    |        |
| Seattle                    | 127 (4.44)   | 129 (4.51)   | 256 (4.48)   |        |
| Texas                      | 671 (23.47)  | 675 (23.61)  | 1346 (23.54) |        |
| Utah                       | 34 (1.19)    | 35 (1.22)    | 69 (1.21)    |        |
| Charlson Comorbidity Index |              |              |              | 0.5577 |
| 0                          | 1488 (52.05) | 1525 (53.34) | 3013 (52.69) |        |
| 1                          | 862 (30.15)  | 850 (29.73)  | 1712 (29.94) |        |
| 2+                         | 509 (17.8)   | 484 (16.93)  | 993 (17.37)  |        |
| T stages                   |              |              |              | 0.7454 |
| T0/T1                      | 839 (29.35)  | 864 (30.22)  | 1703 (29.78) |        |
| T2                         | 1272 (44.49) | 1281 (44.81) | 2553 (44.65) |        |
| T3                         | 157 (5.49)   | 153 (5.35)   | 310 (5.42)   |        |
| Unknown                    | 591 (20.67)  | 561 (19.62)  | 1152 (20.15) |        |
| Cancer type                |              |              |              | 0.8407 |
| NSCLC                      | 2643 (92.44) | 2647 (92.58) | 5290 (92.52) |        |
| Small cell                 | 216 (7.56)   | 212 (7.42)   | 428 (7.49)   |        |

NSCLC: Non-small cell lung cancer

*Online supplements are not copyedited prior to posting.*
